# Supplementary material for: Altered Visual Function in Short-Wave-Sensitive 1 (sws1) Gene Knockout Japanese Medaka (Oryzias latipes) Larvae
Source: MDPI journal article supplement (doi:10.3390/cells12172157), 2023-08-28
Supplement: s1 [file s1]

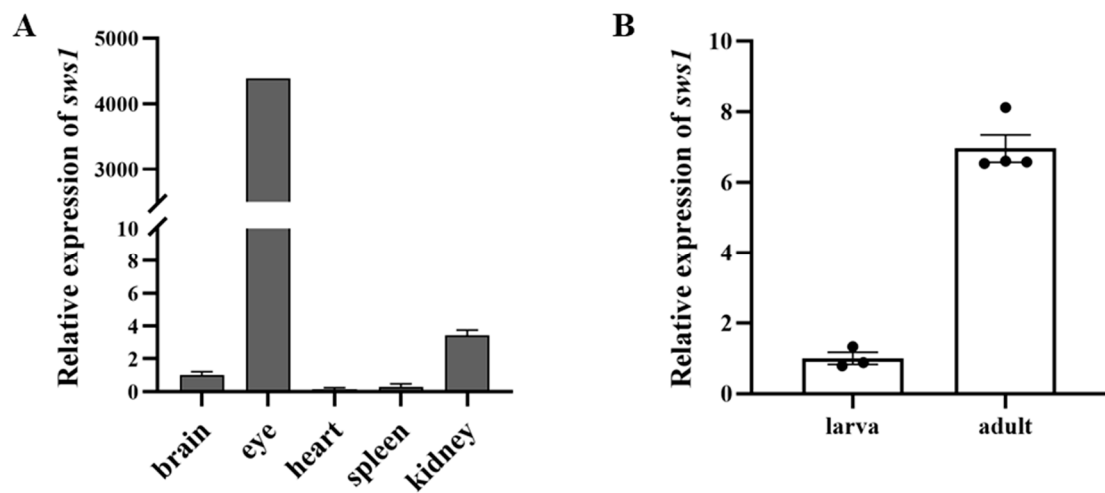

**Figure S1 The expression pattern of *sws1* in medaka.** (A) Detection of *sws1* mRNA expression in different tissues by RT-PCR (n = 3). (B) The mRNA level of *sws1* in larval and adult medaka (n = 6). All data were expressed as means  $\pm$  S.E.M.

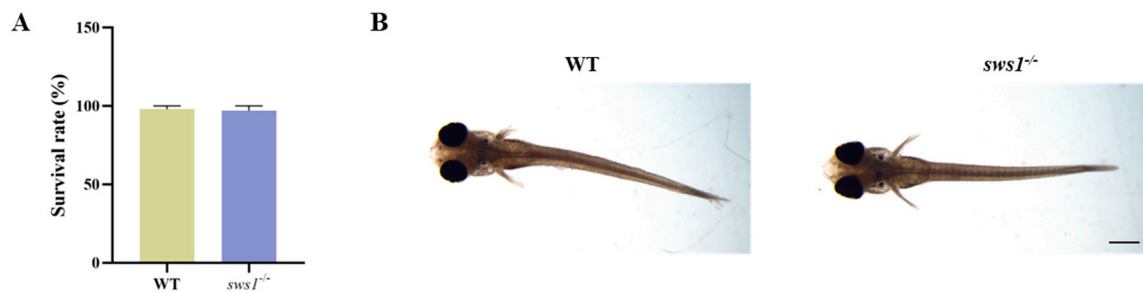

**Figure S2 The survival and morphology of WT and *sws1*<sup>-/-</sup> medaka larvae.** (A) Statistic analysis of survival rate in WT and *sws1*<sup>-/-</sup> medaka larvae. (B) Photographs of larvae at 6 dph for WT and *sws1*<sup>-/-</sup> medaka. Scale bar: 500  $\mu$ m.

**Table S1** The primers used for CRISPR/Cas9.

| Gene                   | Sequence (5'-3')        |
|------------------------|-------------------------|
| <i>sws1</i> guide RNA1 | GTACTACCTGGCCCCGACGTGGG |
| <i>sws1</i> guide RNA2 | GTGAGGGGCTACTACTTCTTTGG |
| <i>sws1</i> test-F     | TCAGCTTCACGATGGGAAAAT   |
| <i>sws1</i> test-R     | CAGGCCTGCAGAGAAAGCAC    |
| <i>sws1</i> ISH-F      | TGGAGCCTTCAAGTTTGGCA    |
| <i>sws1</i> ISH-R      | TGACGAGCCGGTAGTCTTTG    |

**Table S2** The primers for *q*RT-PCR.

| Gene         | Gene No.       | Forward (5'-3')          | Reverse (5'-3')        |
|--------------|----------------|--------------------------|------------------------|
| <i>actin</i> | NM_001104808.1 | TATCATTCGCCTGAAACCGAT    | CTTTGCACATGCCAGATCCG   |
| <i>sws1</i>  | NM_001104656.1 | ACAAAGACTACCGGCTCGTCA    | GCTTCCTCCATCTTCTTTCCGA |
| <i>sws2a</i> | XM_004069227.4 | TGTTACCTGGGTGTGTGCTC     | GAACCGCGAAGCAGAAACAG   |
| <i>sws2b</i> | NM_001104654.1 | TTCTGCTTTGCCGTCCCTT      | AAGCAACAACCATGACGACCA  |
| <i>rh2-a</i> | NM_001104655.1 | TTTGGTTGGCTGGTCAAGGT     | CACAAGGCTGCCATAGGTGA   |
| <i>rh2-b</i> | XM_004086130.4 | TGCACTTCTTCGTCCCAGTC     | CCAAGCTACCAGGAAGCCAA   |
| <i>rh2-c</i> | XM_004086132.4 | CTTCTGTGCCGTTGAGGGAT     | ACAAGCCAGAGCCATTACCC   |
| <i>lws</i>   | XM_004069094.4 | TGAGGGCTATGTGGTCTCCA     | ACCTGCTCCATCCAAAGACG   |
| <i>rho</i>   | NM_001104695.1 | CTCGTTACATCCCAGAGGGC     | ATGATGACAACCATGCGGGT   |
| <i>gnat1</i> | XM_004084384.4 | AAGCCCATCTGAGCATGTGT     | TGATGATGTCGGTTACGGCA   |
| <i>gnat2</i> | XM_004070401.3 | GTGAGTCGGGAAAAAGCACC     | CCAGAGCCAGAACCGAAGTC   |
| <i>gnb3a</i> | XM_004077988.4 | CAGCCTCAAAGACCAGATTACGG  | TCATCTGCACACGTCCCAC    |
| <i>gnb3b</i> | NM_001104851.1 | GAAAGCTGAAATGGATGCACTGAA | ACATGCTCCCATCATTTGCTG  |
| <i>grk7a</i> | NM_001104661.1 | CCACCAAGGACGTCATCCA      | CGTGTTTCCTCGGATCCTC    |
| <i>grk7b</i> | XM_004075815.3 | TGAGAGGCAGAAGATTACTGACA  | GCACAACACAAACCTCACCAAA |
| <i>pde6c</i> | XM_004080270.3 | CGGCAAACCTCCAAAAAGCCA    | TGAGGGGGAAGGTGAGCATA   |
